# Supplementary material for: Clarifying values: an updated review
Source: BMC Med Inform Decis Mak. 2013 Nov 29;13(Suppl 2):S8. doi: 10.1186/1472-6947-13-S2-S8 (PMC4044232; doi:10.1186/1472-6947-13-S2-S8)
Supplement: Additional file 4 — Table S3: Trials Examining Effect of a VCM vs. no VCM Within Decision Aids [file 1472-6947-13-S2-S8-S4.pdf]

**Table S3: Trials Examining Effect of a VCM vs. no VCM Within Decision Aids**

| Reference                               | VCM used                                           | Decision or context                                                                                                                     | Summary of findings relevant to VCM                                                                                                                                    |
|-----------------------------------------|----------------------------------------------------|-----------------------------------------------------------------------------------------------------------------------------------------|------------------------------------------------------------------------------------------------------------------------------------------------------------------------|
| Abhyankar<br>2011 [1]<br>(n = 30)       | Pros and Cons<br>with weightings                   | Choice between standard adjuvant chemotherapy for early stage breast cancer and clinical trial testing new chemotherapy                 | VCM resulted in more use of personal values when evaluating attributes of options, somewhat less ambivalence, less uncertainty and did not change decision preference. |
| Clancy<br>1988 [2]<br>(n = 1280)        | Decision analysis<br>with visual<br>analogue scale | Choice between being immunized for Hepatitis B, screened for antibodies and immunized if negative, or not immunized unless exposed      | VCM increased action-taking (screening or vaccination.)                                                                                                                |
| Feldman-Stewart<br>2006 [3]<br>(n = 90) | Rating (sliders)                                   | Choice between four main options for early stage prostate cancer (watchful waiting, surgery, external beam radiation and brachytherapy) | Participants preferred VCM design with summary over VCM without summary and no VCM.                                                                                    |
| Feldman-Stewart<br>2012 [4]             | Rating attributes                                  | Treatment of early stage prostate cancer                                                                                                | VCM users reported higher preparation for decision making retrospectively and had reduced regret at 1 year                                                             |
| Fraenkel<br>2007 [5]<br>(n = 87)        | Conjoint analysis                                  | Choice between treatments for knee pain                                                                                                 | VCM resulted in higher scores on decisional self-efficacy, preparation for decision making, and arthritis self-efficacy                                                |

|                                   |                                                |                                                                                                                                                                                                           |                                                                                                                                                                                                                                                                                                                                                                            |
|-----------------------------------|------------------------------------------------|-----------------------------------------------------------------------------------------------------------------------------------------------------------------------------------------------------------|----------------------------------------------------------------------------------------------------------------------------------------------------------------------------------------------------------------------------------------------------------------------------------------------------------------------------------------------------------------------------|
| Frosch<br>2008 [6]<br>(n = 611)   | Time trade-off and<br>Visual Analogue<br>Scale | Whether or not to have prostate<br>specific antigen (PSA) testing to<br>screen for prostate cancer                                                                                                        | VCM had no effect on preferences for PSA testing,<br>preference for watchful waiting, knowledge or<br>decisional conflict.                                                                                                                                                                                                                                                 |
| Kennedy<br>2002 [7]<br>(n = 894)  | List of concerns<br>and discussion             | Choice between treatment options<br>for menorrhagia (advice and<br>reassurance, addressing possible<br>iatrogenic causes, drug therapy, or<br>surgery such as hysterectomy or<br>endometrial destruction) | VCM resulted in minimal improvements in self-<br>reported health status, lower use of a more invasive<br>treatment, higher patient satisfaction, more frequent<br>clinician perceptions of "longer than usual"<br>consultations, and lower overall costs.                                                                                                                  |
| Labrecque<br>2010 [8]<br>(n = 63) | Rating scales                                  | Whether or not to have a vasectomy                                                                                                                                                                        | VCM had no effect on decisional conflict, knowledge,<br>decision preferences or certainty.                                                                                                                                                                                                                                                                                 |
| Lerman<br>1997 [9]<br>(n = 400)   | List of concerns<br>with discussion            | Whether or not to have genetic<br>testing for BRCA1                                                                                                                                                       | VCM with education resulted in increased perceptions<br>of risks and limitations of BRCA1 testing, but<br>knowledge was no better than education alone.<br>Perceived personal risk decreased more with<br>education alone, and neither VCM and education nor<br>education alone influenced perceptions of benefits of<br>BRCA1 testing, decision intentions, or decisions. |

|                                      |                                                 |                                                                                                                 |                                                                                                                                                                                                                                                                                                                                                                      |
|--------------------------------------|-------------------------------------------------|-----------------------------------------------------------------------------------------------------------------|----------------------------------------------------------------------------------------------------------------------------------------------------------------------------------------------------------------------------------------------------------------------------------------------------------------------------------------------------------------------|
| Montgomery<br>2003 [10]<br>(n = 217) | Decision analysis<br>with standard<br>gamble    | Whether or not to start drug therapy<br>for hypertension                                                        | VCM increased knowledge and reduced total<br>decisional conflict by significantly reducing scores on<br>uninformed, unclear values and unsupported subscales<br>and somewhat reducing scores on uncertainty<br>subscale. VCM did not influence scores on decision<br>quality subscale, nor did it change state anxiety,<br>decision intention, or ultimate decision. |
| O'Connor<br>1999 [11]<br>(n = 201)   | Balance scale<br>(Pros and Cons)                | Whether or not to take hormone<br>replacement therapy after<br>menopause                                        | VCM had no effect on clarity of values, concordance<br>between values and decision, total decisional conflict,<br>other subscales of Decisional Conflict Scale, nor<br>acceptability of intervention.                                                                                                                                                                |
| Sheridan<br>2010 [12]<br>(n = 137)   | Rating and<br>ranking tasks<br>(prioritization) | Whether or not to initiate behaviors<br>to prevent coronary heart disease<br>(CHD), and, if so, which behaviors | VCM increased time spent with online tool, but did<br>not affect decisional conflict, clarity of values,<br>behavioral intentions, perceptions that decision was in<br>line with values, self-efficacy for reducing coronary<br>risk, decision intentions (including number of<br>treatments intended), nor perceptions of tool.                                     |

|                                        |                |                                                                                        |                                                                                                                                                                                                                                                                                                                                                                                                                                   |
|----------------------------------------|----------------|----------------------------------------------------------------------------------------|-----------------------------------------------------------------------------------------------------------------------------------------------------------------------------------------------------------------------------------------------------------------------------------------------------------------------------------------------------------------------------------------------------------------------------------|
| van Roosmalen<br>2004 [13]<br>(n = 88) | Time Trade-off | Choice between intensive screening and prophylactic surgery for breasts and/or ovaries | VCM resulted in lower scores on depression and intrusive thoughts, higher self-rated health, stronger treatment preferences for breasts, increased perceptions of having weighed pros and cons for breast treatments, and perceptions that specialists had a strong preference about breast treatments 9 months post-intervention. There were no significant differences observed for any outcomes at 3 months post-intervention. |
|----------------------------------------|----------------|----------------------------------------------------------------------------------------|-----------------------------------------------------------------------------------------------------------------------------------------------------------------------------------------------------------------------------------------------------------------------------------------------------------------------------------------------------------------------------------------------------------------------------------|

## References

- [1] Abhyankar P, Bekker HL, Summers BA, Velikova G: **Why values elicitation techniques enable people to make informed decisions about cancer trial participation.** *Health Expect* 2011, **14 Suppl 1**:20-32.
- [2] Clancy CM, Cebul RD, Williams SV: **Guiding individual decisions: a randomized, controlled trial of decision analysis.** *Am J Med* 1988, **84**:283-288.
- [3] Feldman-Stewart D, Brennenstuhl S, Brundage MD, Roques T: **An explicit values clarification task: development and validation.** *Patient Educ Couns* 2006, **63**:350-356.
- [4] Feldman-Stewart D, Tong C, Siemens R, Alibhai S, Pickles T, Robinson J, Brundage MD: **The impact of explicit values clarification exercises in a patient decision aid emerges after the decision is actually made: evidence from a randomized controlled trial.** *Med Decis Making* 2012, **32**:616-626.
- [5] Fraenkel L, Rabidou N, Wittink D, Fried T: **Improving informed decision-making for patients with knee pain.** *J Rheumatol* 2007, **34**:1894-1898.
- [6] Frosch DL, Bhatnagar V, Tally S, Hamori CJ, Kaplan RM: **Internet patient decision support: a randomized controlled trial comparing alternative approaches for men considering prostate cancer screening.** *Arch Intern Med* 2008, **168**:363-369.
- [7] Kennedy AD, Sculpher MJ, Coulter A, Dwyer N, Rees M, Abrams KR, Horsley S, Cowley D, Kidson C, Kirwin C, Naish C, Stirrat G: **Effects of decision aids for menorrhagia on treatment choices, health outcomes, and costs: a randomized controlled trial.** *JAMA* 2002, **288**:2701-2708.
- [8] Labrecque M, Paunescu C, Plesu I, Stacey D, Legare F: **Evaluation of the effect of a patient decision aid about vasectomy on the decision-making process: a randomized trial.** *Contraception* 2010, **82**:556-562.
- [9] Lerman C, Biesecker B, Benkendorf JL, Kerner J, Gomez-Caminero A, Hughes C, Reed MM: **Controlled trial of pretest education approaches to enhance informed decision-making for BRCA1 gene testing.** *J Natl Cancer Inst* 1997, **89**:148-157.

- [10] Montgomery AA, Fahey T, Peters TJ: **A factorial randomised controlled trial of decision analysis and an information video plus leaflet for newly diagnosed hypertensive patients.** *Br J Gen Pract* 2003, **53**:446-453.
- [11] O'Connor AM, Wells GA, Tugwell P, Laupacis A, Elmslie T, Drake E: **The effects of an 'explicit' values clarification exercise in a woman's decision aid regarding postmenopausal hormone therapy.** *Health Expect* 1999, **2**:21-32.
- [12] Sheridan SL, Griffith JM, Behrend L, Gizlice Z, Cai JW, Pignone MP: **Effect of Adding a Values Clarification Exercise to a Decision Aid on Heart Disease Prevention: A Randomized Trial.** *Med Decis Making* 2010, **30**:E28-E39.
- [13] van Roosmalen MS, Stalmeier PF, Verhoef LC, Hoekstra-Weebers JE, Oosterwijk JC, Hoogerbrugge N, Moog U, van Daal WA: **Randomised trial of a decision aid and its timing for women being tested for a BRCA1/2 mutation.** *Br J Cancer* 2004, **90**:333-342.
